# Supplementary material for: Community-based surveillance of unaccompanied and separated children in drought-affected northern Ethiopia
Source: Springer Nature journal article supplement (doi:10.1186/s12914-019-0203-9), 2019-06-10
Supplement: MOESM1 [file 16787380]

| Step 1                                                                                                                                                                                                                                                                                                                                                                                                                                                    |       | Step 2                                                                                                                                                                                     |      | Step 3                      |      | Step 4                                            |      | Step 5                              |          | Step 6                      |                     |    |
|-----------------------------------------------------------------------------------------------------------------------------------------------------------------------------------------------------------------------------------------------------------------------------------------------------------------------------------------------------------------------------------------------------------------------------------------------------------|-------|--------------------------------------------------------------------------------------------------------------------------------------------------------------------------------------------|------|-----------------------------|------|---------------------------------------------------|------|-------------------------------------|----------|-----------------------------|---------------------|----|
| Age                                                                                                                                                                                                                                                                                                                                                                                                                                                       | Code  | Sex                                                                                                                                                                                        | Code | Separated or Unaccompanied? | Code | Departed or Arriving Child?                       | Code | Reason for Separation?              | Code     | He/she lives with whom?     | Code                |    |
| Provide Age                                                                                                                                                                                                                                                                                                                                                                                                                                               | 00-17 | Female                                                                                                                                                                                     | 20   | Separated                   | 30   | Disappeared/departed from community               | 40   | Water shortage                      | 50       | Parents                     | 70                  |    |
| 0-4                                                                                                                                                                                                                                                                                                                                                                                                                                                       | 94    | Male                                                                                                                                                                                       | 21   | Unaccompanied               | 31   | New arrival in community                          | 41   | Death of parents/primary caregivers | 51       | Uncle/aunt/grandparents     | 71                  |    |
| 5-9                                                                                                                                                                                                                                                                                                                                                                                                                                                       | 95    | Don't Know                                                                                                                                                                                 | 28   | Don't Know                  | 38   | Neither departure nor arrival (in same community) | 42   | Work                                | 52       | Brothers/sisters > 17 years | 72                  |    |
| 10-14                                                                                                                                                                                                                                                                                                                                                                                                                                                     | 96    |                                                                                                                                                                                            |      |                             |      | Don't Know                                        | 48   | School                              | 53       | Other family >17 years      | 73                  |    |
| 15-17                                                                                                                                                                                                                                                                                                                                                                                                                                                     | 97    |                                                                                                                                                                                            |      |                             |      |                                                   |      | Lack of food                        | 54       | Non-family other adults     | 74                  |    |
| Don't Know                                                                                                                                                                                                                                                                                                                                                                                                                                                | 98    | <p><b>If no cases occurred during the week. send a message with 0000 indicating you have nothing to report</b></p> <p><b>If you need someone to call you. send a message with 9999</b></p> |      |                             |      |                                                   |      |                                     | Ran away | 55                          | With other children | 75 |
| <ul style="list-style-type: none"> <li>You must send at least one text message per week by Sunday of each week to 0935802756</li> <li>For each child, provide a code for all six steps. even if you do not know the answer for each step</li> <li>Each step must be separated by a period</li> <li>If there are multiple responses within the same step, you may write up to 2 responses separated by a comma. Example: 05. 20. 30.42.50,51.60</li> </ul> |       |                                                                                                                                                                                            |      |                             |      |                                                   |      | Loss of shelter/property            | 56       | Spouse                      | 76                  |    |
|                                                                                                                                                                                                                                                                                                                                                                                                                                                           |       |                                                                                                                                                                                            |      |                             |      |                                                   |      | Marriage                            | 57       | Institution/group home      | 77                  |    |
|                                                                                                                                                                                                                                                                                                                                                                                                                                                           |       |                                                                                                                                                                                            |      |                             |      |                                                   |      | Lost during movement                | 58       | Alone                       | 78                  |    |
|                                                                                                                                                                                                                                                                                                                                                                                                                                                           |       |                                                                                                                                                                                            |      |                             |      |                                                   |      | Guardian disappearance              | 59       | Other                       | 79                  |    |
|                                                                                                                                                                                                                                                                                                                                                                                                                                                           |       |                                                                                                                                                                                            |      |                             |      |                                                   |      | Loss of livestock                   | 60       | Don't know                  | 88                  |    |
|                                                                                                                                                                                                                                                                                                                                                                                                                                                           |       |                                                                                                                                                                                            |      |                             |      |                                                   |      | Trafficking/kidnapping              | 61       |                             |                     |    |
|                                                                                                                                                                                                                                                                                                                                                                                                                                                           |       |                                                                                                                                                                                            |      |                             |      |                                                   |      | Other                               | 62       |                             |                     |    |
| Don't Know                                                                                                                                                                                                                                                                                                                                                                                                                                                | 68    |                                                                                                                                                                                            |      |                             |      |                                                   |      |                                     |          |                             |                     |    |
