# Supplementary material for: Community-based surveillance of unaccompanied and separated children in drought-affected northern Ethiopia
Source: Springer Nature journal article supplement (doi:10.1186/s12914-019-0203-9), 2019-06-10
Supplement: MOESM2 [file 16787380]

Measuring Separation in Emergency Situations  
SMS Community Monitoring  
Final Evaluation Form for Key Informants

Date: \_\_\_ / \_\_\_ / \_\_\_

Official Title: \_\_\_\_\_ Administrative Level: \_\_\_\_\_

Kebele: \_\_\_\_\_ Site: \_\_\_\_\_

1. How did you hear about this pilot project?

- a. I was told about this pilot by the MSiE team (i.e. Columbia University, Save the Children, IOM).
- b. From Federal Government Administration.
- c. From the Zonal office.
- d. From the Woreda Office.
- e. From Kebele Chairperson/Manager.
- f. From Community Focal Points.
- g. Other(s) (please specify): \_\_\_\_\_

2. What did you understand about the purpose of the pilot project?

---

---

3. Based on your own experience and what you previously knew about separated and unaccompanied children, do you think this is an issue of concern? Please explain your reason(s).

---

---

4. Has your opinion changed now that the project is over?

Yes  No

IF YES, GO TO 4A. IF NO,  
SKIP TO Q5.

4a. Please explain why you changed your opinion:

---



Measuring Separation in Emergency Situations  
SMS Community Monitoring  
Final Evaluation Form for Key Informants

8. On a scale of 1 to 10, where 1 is Very Bad, and 10 is Very Good; overall, what was your perception of the Measuring Separation in Emergency Situations project?

0      1      2      3      4      5      6      7      8      9      10  
Very Bad                                          Neither Good or Bad                                          Very Good

8a. Could you please provide the reason(s) for your answer above?

---

---

9. What could be done to improve a monitoring program like this in the future?

---

---

10. Do you think a monitoring program like this would be useful for your organization/government to adopt in the future?

Yes                       No

10a. Please describe the reason for your answer below:

---

---

11. What was your experience working with the MSiE team throughout the duration of the project? Please elaborate:

---

---

12. Were there any concerns that arose with regards to the project or with some of the cases that were identified from the project?

If yes, please describe:

---

---

13. Do you have any other questions or comments?

---

---

Additional Questions for Kebele Chair persons and/or Kebele Managers.

1. How much time did you spend in your role to support the MSiE project?

\_\_ \_\_ hours per week

IF '0' HOURS IS MENTIONED,  
SKIP TO Q2.

2. Could you please briefly describe your role in supporting the MSiE project?

---

---

3. Did you work with the Community Focal Points in the geographic area you oversee to report cases?

Yes  No

If yes, please explain how:

---

---

Measuring Separation in Emergency Situations  
SMS Community Monitoring  
Final Evaluation Form for Key Informants

4. Did any of the Community Focal Points approach you for any reason relating to the project?

Yes  No

IF YES, GO TO 4A. IF NO,  
INTERVIEW ENDS HERE.

4a. Why did Community Focal Points approach you? Did they...

- |                                                             |     |    |    |
|-------------------------------------------------------------|-----|----|----|
| i. ... need technical assistance with using the cellphones, | Yes | No | DK |
| ii. ... need clarification on how to report the cases,      | Yes | No | DK |
| iii. ... need to report an urgent action case,              | Yes | No | DK |
| iv. ... just wanted to talk to you casually,                | Yes | No | DK |
| v. ... want to find out about cases from you, or            | Yes | No | DK |
| vi. ... have any other reason?                              | Yes | No | DK |

If yes, please state what other reason(s): \_\_\_\_\_

5. Based on your experience during the past 6 months, how many children do you think were separated or unaccompanied (either arrived, departed, or no movement) in the geographic area of the pilot program?

\_\_ \_\_ in total.

5a. Out of that number, how many do you think on average were separated or unaccompanied in a week/month (depending on the number)?

\_\_ \_\_ per week / month.

6. Do you have records of the children that are separated and unaccompanied?

Yes  No

7. Which month(s) do you think had the most number of separated and unaccompanied children? Could you please explain the reason(s) for your answer?

\_\_\_\_\_  
\_\_\_\_\_

Measuring Separation in Emergency Situations  
SMS Community Monitoring  
Final Evaluation Form for Key Informants

8. Do you think this happened because of the on-going drought, or is this an annual occurrence? Please provide an explanation for your answer.

---

---
